# Supplementary material for: Epigallocatechin gallate incorporation into lignin enhances the alkaline delignification and enzymatic saccharification of cell walls
Source: PubMed Central journal article supplement (PMC3477100; doi:10.1186/1754-6834-5-59), 2012-08-13
Supplement: 1754-6834-5-59-S1.pdf [file 1754-6834-5-59-S1.pdf]

## Additional File 1

*Epigallocatechin Gallate Incorporation into Lignin Enhances the Alkaline Delignification and Enzymatic Saccharification of Cell Walls — Ehumalai et al.*

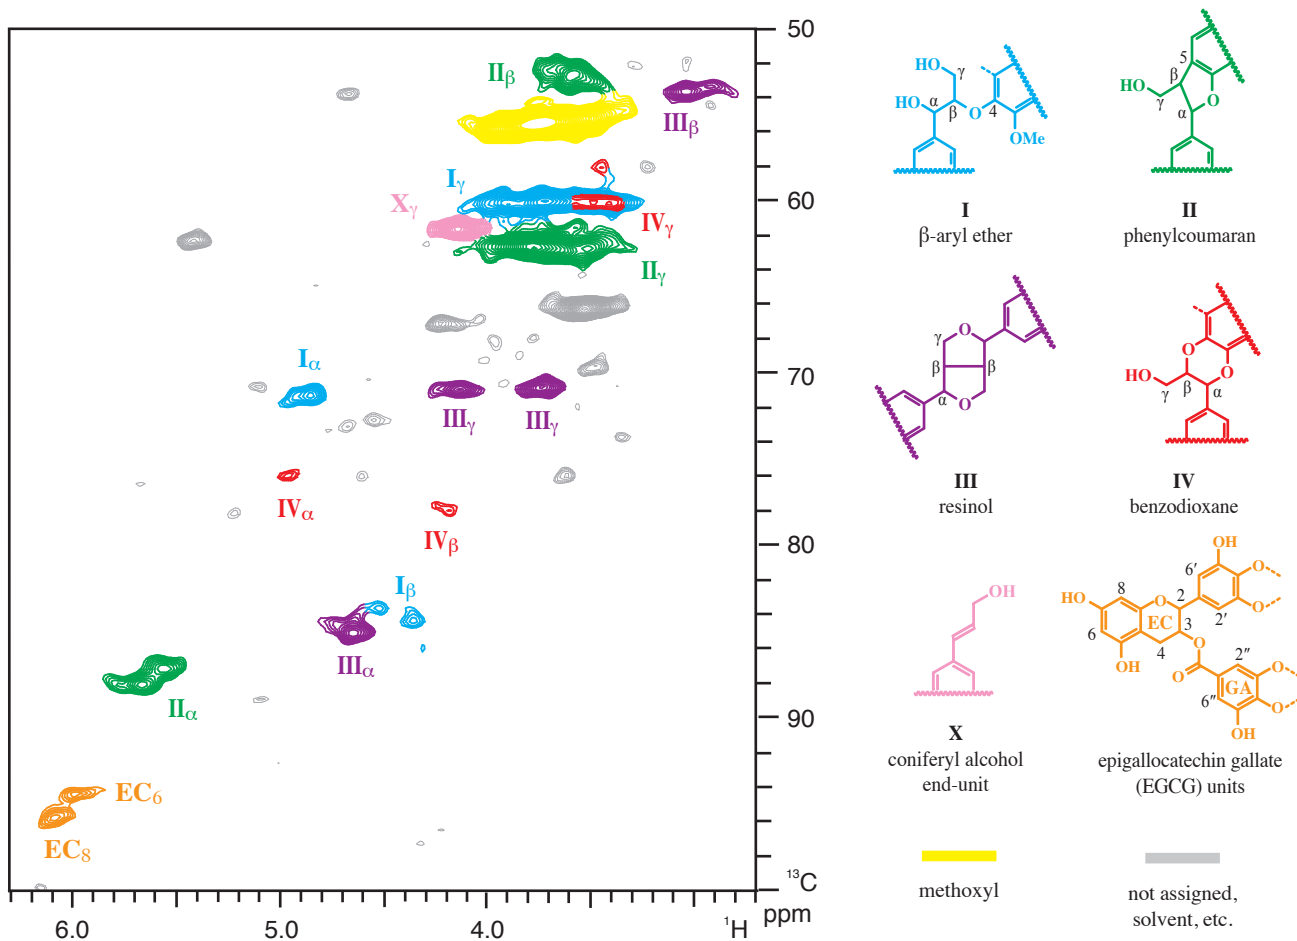

**Figure S1.** Partial short-range  $^{13}\text{C}$ - $^1\text{H}$  correlation (HSQC) NMR spectrum of a dehydrogenation polymer (DHP) prepared by HRP-catalyzed copolymerization of coniferyl alcohol (CA) and epigallocatechin gallate (EGCG) using the “end-wise” polymerization method.[1] The DHP was poorly soluble in general organic solvents (see main text). Therefore, the spectrum was acquired in a suspension-state (~30 mg DHP in 600  $\mu\text{l}$  DMSO- $d_6$ :pyridine- $d_5$ , 4:1, v/v) on a Bruker AVANCE 700 Spectrometer (700 MHz).

Reference: [1] Tobimatsu Y, Davidson CL, Grabber JH, Ralph J: **Fluorescence-tagged monolignols: Synthesis and application to studying *in vitro* lignification.** *Biomacromolecules* 2011, **12**:1752-1761.
